# Supplementary material for: Estimation of the Age of the Kashubian-Specific Pathogenic NPHS2 Variant Responsible for Hereditary Steroid-Resistant Nephrotic Syndrome Points to Its Recent Local Origin
Source: Hindawi journal article supplement (doi:10.1155/2024/8205102), 2024-03-21
Supplement: f1 [file 8205102.f1.pdf]

**Supplementary Table. Details of the background haplotypes**

SNP positions of the LONGEST background c.1032delT (left side) or c.686G>A (right side) haplotypes are shown. For brevity, SNP positions at which alleles in the background c.1032delT haplotype were found in the general population at the frequency >0.6 are not listed. Haplotype segment encompassing the NPHS2 gene (in the reverse orientation) is boxed; red font indicates positions of the studied variants.

| SNP name       | Pos_hg19  | c.1032delT | c.686G>A |
|----------------|-----------|------------|----------|
| rs12735706     | 163399083 | C          |          |
| GSA-rs10917756 | 163422320 | G          |          |
| rs10753622     | 163582039 | C          |          |
| rs10799944     | 163697998 | A          |          |
| rs3856207      | 163747095 | A          |          |
| rs12139078     | 163886496 | G          |          |
| rs7533006      | 164078275 | G          |          |
| rs4657329      | 164082055 | C          |          |
| rs12037444     | 164144117 | A          |          |
| GSA-rs2881506  | 164212456 | G          |          |
| rs3898199      | 164533643 | T          |          |
| rs2996669      | 164595489 | T          |          |
| rs1686184      | 164663314 | C          |          |
| rs2171692      | 164666940 | G          |          |
| rs1844294      | 164678924 | C          |          |
| rs10753644     | 164691787 | G          |          |
| rs7543038      | 164723835 | T          |          |
| rs12737465     | 164743778 | A          |          |
| GSA-rs2185217  | 164786245 | G          |          |
| rs10800064     | 164948745 | G          |          |
| rs12404676     | 165032246 | T          |          |
| rs2881832      | 165047786 | T          |          |
| rs2348108      | 165071376 | C          |          |
| rs923937       | 165081033 | C          |          |
| rs1494405      | 165107381 | A          |          |
| rs4657422      | 165210027 | T          |          |
| rs71583439     | 165288280 | A          |          |
| rs11809911     | 165288357 | C          |          |
| rs12057296     | 165342963 | T          |          |
| rs12723379     | 165364340 | A          |          |
| rs283695       | 165376499 | A          |          |
| rs2134095      | 165377552 | G          |          |
| rs3835280      | 165378731 | C          |          |
| seq_rs10489744 | 165380623 | G          |          |
| rs115079560    | 165383021 | C          |          |
| rs285480       | 165403903 | G          |          |
| rs7519141      | 165425536 | A          |          |
| rs56683119     | 165482885 | A          |          |
| rs10800120     | 165605310 | A          |          |
| rs12723198     | 165702346 | T          |          |
| rs61800446     | 165709420 | A          |          |
| rs2153264      | 165787477 | G          |          |
| rs6677965      | 165811729 | T          |          |
| rs4535982      | 165815939 | C          |          |
| rs10753694     | 165818621 | A          |          |
| rs10494448     | 165831128 | A          |          |
| rs4657482      | 165831649 | A          |          |

|                |           |   |
|----------------|-----------|---|
| rs3762365      | 165860813 | C |
| rs472888       | 165896757 | T |
| rs2349106      | 165903962 | A |
| rs6658459      | 165917032 | T |
| rs9426847      | 166001463 | T |
| rs1319898      | 166007024 | C |
| rs10918467     | 166415259 | T |
| rs12566754     | 166444011 | C |
| rs7552777      | 166456704 | T |
| rs7544608      | 166458160 | C |
| rs6695015      | 166489143 | G |
| rs530690       | 166579080 | C |
| rs3845541      | 166618118 | T |
| GSA-rs530303   | 166623180 | G |
| rs562445       | 166730812 | T |
| GSA-rs2064067  | 166782438 | T |
| rs4656514      | 166792496 | A |
| rs6675033      | 166826655 | T |
| rs2075982      | 166929527 | G |
| rs6698931      | 167015184 | T |
| GSA-rs1571284  | 167018916 | C |
| rs6666045      | 167024631 | T |
| rs12404508     | 167036714 | A |
| rs2281962      | 167059760 | A |
| rs988778       | 167103945 | G |
| GSA-rs11808527 | 167111293 | T |
| rs869714       | 167126250 | T |
| rs12409740     | 167137872 | A |
| rs6663642      | 167161112 | C |
| rs864537       | 167411384 | G |
| rs2995093      | 167445001 | G |
| rs858553       | 167455145 | A |
| rs17534481     | 167470817 | T |
| rs2794984      | 167494622 | G |
| rs704859       | 167500815 | T |
| rs4657670      | 167534270 | C |
| GSA-rs11584355 | 167549747 | T |
| GSA-rs767707   | 167560542 | A |
| rs1229355      | 167641292 | G |
| GSA-rs1933075  | 167676364 | A |
| rs10918751     | 167702255 | A |
| rs4657718      | 167772498 | A |
| rs3213588      | 167778843 | G |
| rs1476075      | 167794406 | A |
| rs3767457      | 167822213 | C |
| rs7512378      | 167825134 | G |
| rs2071921      | 167825485 | C |
| rs203849       | 167849414 | A |
| rs11558511     | 168013850 | C |
| GSA-rs10753767 | 168167553 | A |
| GSA-rs3819818  | 168257331 | G |
| rs10800350     | 168262624 | A |
| rs6427122      | 168274691 | C |
| rs1883148      | 168278264 | G |
| rs6685230      | 168368154 | C |
| rs2300568      | 168375973 | T |
| rs4656587      | 168382000 | G |

|                |           |   |
|----------------|-----------|---|
| GSA-rs1810467  | 168413221 | A |
| rs858099       | 168426153 | A |
| rs2206117      | 168435184 | C |
| rs10918904     | 168453205 | G |
| rs1323530      | 168489847 | C |
| rs524705       | 168665974 | C |
| rs610403       | 168707974 | G |
| GSA-rs655128   | 168711459 | T |
| rs2786765      | 168741270 | C |
| rs6427151      | 168748125 | C |
| rs10800383     | 168764740 | T |
| GSA-rs10918996 | 168795713 | T |
| rs6656076      | 168815719 | A |
| rs2143091      | 168816245 | G |
| GSA-rs169266   | 168824111 | T |
| rs1885555      | 168851940 | G |
| rs10737544     | 168891735 | G |
| rs6427160      | 168892181 | T |
| rs6675509      | 169043061 | A |
| rs1200106      | 169056946 | A |
| rs1200114      | 169060489 | G |
| rs926516       | 169073050 | C |
| rs1358714      | 169079419 | A |
| GSA-rs6030     | 169498975 | C |
| rs6427200      | 169523706 | A |
| GSA-rs7540556  | 169531442 | C |
| GSA-rs10489185 | 169548892 | A |
| rs6703865      | 169550963 | A |
| GSA-rs1018828  | 169557734 | G |
| rs6127         | 169566313 | T |
| rs2235302      | 169580290 | T |
| GSA-rs3917688  | 169591080 | T |
| rs1800805      | 169601281 | T |
| rs1569476      | 169608917 | T |
| rs10157266     | 169756389 | A |
| GSA-rs16862682 | 169757024 | T |
| GSA-rs9803860  | 169794359 | G |
| GSA-rs10919299 | 170067296 | A |
| rs12042109     | 170085453 | C |
| GSA-rs532141   | 170139508 | C |
| rs11585754     | 170141722 | A |
| rs7518785      | 170168182 | T |
| rs34760177     | 170191520 | G |
| rs4509636      | 170192022 | C |
| rs2225588      | 170202563 | C |
| rs983118       | 170206902 | A |
| rs6427247      | 170380480 | G |
| rs1591148      | 170386703 | T |
| GSA-rs12044570 | 170443579 | C |
| GSA-rs16863425 | 170519884 | C |
| rs12567093     | 170554331 | C |
| GSA-rs1928715  | 170567437 | C |
| rs7540157      | 170582464 | C |
| rs619456       | 170585832 | C |
| rs577676       | 170587340 | T |
| GSA-rs6665169  | 170605146 | T |
| rs12129225     | 170615833 | C |

|                |           |   |
|----------------|-----------|---|
| GSA-rs623752   | 170618291 | G |
| rs502612       | 170641803 | C |
| rs593479       | 170642899 | C |
| rs520131       | 170654118 | T |
| rs17550940     | 170657335 | C |
| rs513287       | 170664237 | A |
| rs10800546     | 170807586 | A |
| rs10919497     | 170824375 | C |
| GSA-rs7517226  | 170832682 | G |
| GSA-rs979070   | 170897273 | A |
| rs4656815      | 170901445 | G |
| rs17562549     | 170913695 | G |
| rs4656233      | 170915133 | C |
| rs28850650     | 170943197 | C |
| rs6608461      | 171056691 | G |
| rs2064076      | 171062498 | G |
| rs12076145     | 171069959 | A |
| rs2266782      | 171076966 | G |
| rs2075992      | 171080485 | C |
| rs1795240      | 171091875 | A |
| rs1736565      | 171112490 | C |
| rs1795244      | 171119021 | T |
| rs11806072     | 171156997 | G |
| GSA-rs10798318 | 171302986 | A |
| rs2235510      | 171314142 | C |
| GSA-rs1963273  | 171322446 | T |
| rs6670432      | 171324017 | A |
| GSA-rs2421809  | 171371998 | A |
| rs2207189      | 171388916 | C |
| rs7519763      | 171389475 | T |
| rs7540116      | 171393787 | C |
| GSA-rs10913039 | 171417202 | T |
| rs235854       | 171592869 | A |
| GSA-rs12029997 | 171597351 | T |
| rs604864       | 171608466 | C |
| rs235913       | 171618656 | T |
| rs9943293      | 171654968 | T |
| rs6685742      | 171674774 | A |
| GSA-rs12032340 | 171735198 | C |
| rs2232818      | 171755170 | A |
| GSA-rs12753344 | 171799381 | A |
| rs10798691     | 171807956 | A |
| rs2224396      | 171955221 | A |
| rs10910863     | 171960993 | T |
| rs12091015     | 172019718 | T |
| rs4075021      | 172063516 | G |
| rs583578       | 172156886 | G |
| rs633995       | 172186729 | G |
| rs12045298     | 172302258 | C |
| GSA-rs9425291  | 172312769 | G |
| rs1011731      | 172346548 | A |
| rs714515       | 172352990 | A |
| GSA-rs9286854  | 172366806 | G |
| GSA-rs10912080 | 172603411 | C |
| rs2859228      | 172613241 | A |
| rs2859229      | 172615017 | C |
| rs1492899      | 172615395 | C |

|                 |           |   |
|-----------------|-----------|---|
| rs2859242       | 172624864 | C |
| rs929087        | 172632057 | G |
| rs10458360      | 172633975 | C |
| rs859655        | 172650450 | A |
| rs859673        | 172680465 | C |
| rs4916193       | 172684613 | G |
| rs859637        | 172711000 | T |
| rs2022168       | 172724394 | G |
| GSA-rs12145987  | 172727553 | G |
| rs859627        | 172728946 | G |
| rs11810332      | 172789765 | A |
| rs57701379      | 172810439 | T |
| rs4916288       | 172884872 | G |
| rs6425189       | 172930064 | C |
| rs2179424       | 172935443 | A |
| rs10912561      | 173164565 | T |
| rs4916319       | 173266578 | A |
| rs7546568       | 173297704 | A |
| rs1342038       | 173301516 | A |
| rs1539259       | 173312501 | G |
| rs4916352       | 173369724 | C |
| GSA-rs4916219   | 173373183 | T |
| rs10798277      | 173373452 | C |
| GSA-rs72709386  | 173674087 | T |
| GSA-rs72709386  | 173674087 | T |
| rs997985        | 175010010 | G |
| rs6694071       | 175057782 | G |
| rs12083818      | 175083952 | C |
| rs6690229       | 175086461 | G |
| GSA-rs6656284   | 175087677 | A |
| GSA-rs6696455   | 175087729 | C |
| rs7521981       | 175091151 | A |
| rs10798333      | 175092707 | T |
| rs6701037       | 175120079 | C |
| rs3753555       | 175162805 | T |
| rs6659761       | 175183939 | T |
| GSA-rs61805318  | 175275465 | C |
| rs11802001      | 175290855 | A |
| rs3766680       | 175296448 | T |
| rs9283389       | 175309281 | T |
| GSA-rs61806376  | 175312291 | G |
| GSA-rs2236883   | 175338419 | C |
| GSA-rs1351963   | 175343297 | C |
| rs10912985      | 175436833 | A |
| rs859413        | 175444933 | A |
| rs12738827      | 175454533 | G |
| GSA-rs2861311   | 175469011 | G |
| GSA-rs859357    | 175493901 | G |
| rs859363        | 175495225 | A |
| GSA-rs78931309  | 175505444 | A |
| rs17305076      | 175534602 | T |
| rs4652099       | 175629207 | A |
| rs12025758      | 175638336 | A |
| rs9787193       | 175692304 | T |
| GSA-rs6425361   | 175756706 | T |
| rs12561903      | 175757061 | T |
| GSA-rs115043014 | 175757311 | G |

|                 |           |   |   |
|-----------------|-----------|---|---|
| GSA-rs78950439  | 175813072 | A |   |
| rs532799        | 175852209 | A |   |
| rs10753110      | 175869554 | C |   |
| GSA-rs352299    | 176248930 | C |   |
| rs2455730       | 176295837 | G |   |
| rs7552857       | 176429364 | G |   |
| rs11583447      | 176521349 | T |   |
| rs12134567      | 176601365 | G |   |
| rs12118102      | 176634724 | G |   |
| rs12117539      | 176703822 | G |   |
| rs1325598       | 176792249 | G |   |
| GSA-rs74826447  | 176940744 | T |   |
| GSA-rs172917    | 176992553 | A |   |
| rs227530        | 177058201 | T |   |
| rs7519595       | 177074669 | T |   |
| rs6667502       | 177111162 | T |   |
| rs12128612      | 177158631 | C |   |
| rs10753144      | 177165301 | G |   |
| rs10913300      | 177193408 | A |   |
| rs932311        | 177193697 | T |   |
| rs16851031      | 177258204 | T |   |
| rs12569209      | 177279412 | A |   |
| rs10798510      | 177303628 | T |   |
| rs9425805       | 177321917 | T |   |
| rs9662701       | 177384036 | G |   |
| rs2038486       | 177458431 | T |   |
| rs1098777       | 177508044 | A |   |
| rs10737325      | 177512260 | T |   |
| rs1252066       | 177626285 | T |   |
| rs17625634      | 177629723 | T |   |
| rs12035381      | 177648733 | G |   |
| rs10753167      | 177651729 | T |   |
| rs4509537       | 177671478 | T |   |
| rs7542551       | 177680031 | A |   |
| rs3131331       | 177739013 | T |   |
| rs10913419      | 177755464 | G |   |
| rs7411090       | 177762940 | C |   |
| rs4072161       | 177769687 | T |   |
| rs10798572      | 177791110 | T |   |
| rs750725        | 177842998 | C |   |
| rs6659428       | 177863472 | C |   |
| rs10798580      | 177864554 | G | A |
| rs623479        | 177898799 | C | C |
| rs2182914       | 177903578 | C | T |
| rs3828137       | 177920754 | A | A |
| rs10913472      | 177929554 | C | C |
| GSA-rs41267164  | 177939593 | A | G |
| rs7340104       | 177971866 | C | T |
| rs12074053      | 177974569 | T | C |
| rs7530170       | 178001395 | G | A |
| GSA-rs75130631  | 178018302 | G | A |
| rs7540551       | 178018617 | A | G |
| rs76981544      | 178019456 | C | T |
| rs73049311      | 178029856 | A | G |
| rs16852409      | 178041772 | G | A |
| rs11583320      | 178042145 | C | T |
| GSA-rs113867106 | 178191001 | C | T |

|                 |           |   |   |
|-----------------|-----------|---|---|
| GSA-rs1412784   | 178206664 | G | A |
| GSA-rs12239670  | 178377761 | T | G |
| rs4304537       | 178476554 | T | C |
| GSA-rs41267184  | 178483355 | T | C |
| rs12036376      | 178582741 | A | G |
| rs6659392       | 178598873 | T | C |
| rs10429850      | 178612000 | G | A |
| rs1122579       | 178615214 | C | T |
| rs2811314       | 178619183 | A | G |
| GSA-rs111491640 | 178659370 | A | C |
| rs1018669       | 178687459 | A | C |
| rs12217138      | 178911282 | T | C |
| rs10737335      | 178943738 | T | T |
| rs1012066       | 178964604 | A | G |
| rs7534481       | 178971774 | T | C |
| GSA-rs10913670  | 178972922 | T | C |
| rs10913672      | 178981416 | G | A |
| GSA-rs12725164  | 178984086 | C | T |
| rs6425513       | 179006462 | G | A |
| rs3829794       | 179072728 | T | T |
| GSA-rs9728480   | 179089491 | A | C |
| GSA-rs10913736  | 179335366 | T | C |
| GSA-rs12725126  | 179427632 | A | G |

|                                 |           |      |     |
|---------------------------------|-----------|------|-----|
| <b>NHPS2 3'</b>                 | 179519674 | T    | T   |
| <b>c.1032delT</b>               | 179520435 | delA | A   |
| <b>c.686G&gt;A (rs61747728)</b> | 179526214 | C    | C>T |
| <b>NHPS2 5'</b>                 | 179545068 | G    | G   |

|                 |           |   |   |
|-----------------|-----------|---|---|
| rs3930537       | 179553724 | A | G |
| rs10753200      | 179564144 | A | G |
| rs6704505       | 179600001 | G | A |
| rs35032839      | 179704436 | G | A |
| rs2245195       | 179716507 | C | T |
| rs34831485      | 179731680 | A | C |
| rs6680679       | 179753147 | G | A |
| GSA-rs115142749 | 179762634 | C | T |
| rs2777920       | 179776841 | G | A |
| rs1148821       | 179795505 | T | C |
| rs357050        | 180234729 | C | T |
| rs7536561       | 180243524 | G | G |
| rs78368507      | 180338404 | T | C |
| rs10798778      | 180536954 | G | G |
| GSA-rs7519155   | 180560692 | T | T |
| GSA-rs116798554 | 180564319 | A | G |
| GSA-rs77382340  | 180568640 | A | G |
| rs3843276       | 180570408 | A | A |
| rs16856367      | 180645588 | A | A |
| GSA-rs76219649  | 180652052 | G | G |
| rs12408176      | 180692815 | T | T |
| rs7536392       | 180877409 | A | A |
| rs12735084      | 180893135 | C | C |
| rs3795504       | 180905448 | T | T |
| rs57113693      | 180952294 | C | C |
| rs1411478       | 180962282 | A | A |
| rs10494536      | 180975865 | C | C |
| rs10797667      | 181028733 | T | T |
| rs6658698       | 181060791 | G | G |
| rs6702513       | 181086122 | C | C |

|                |           |   |   |
|----------------|-----------|---|---|
| rs3897436      | 181100160 | T | T |
| rs7523821      | 181112055 | G | G |
| rs4652567      | 181114794 | A | A |
| rs10752838     | 181116023 | T | T |
| rs10797679     | 181149074 | G | G |
| rs10797688     | 181181995 | C |   |
| rs6425678      | 181185861 | G |   |
| rs1004505      | 181197252 | C |   |
| rs10797698     | 181199735 | T |   |
| GSA-rs3911582  | 181210746 | C |   |
| GSA-rs4652630  | 181227982 | A |   |
| rs2501545      | 181230769 | T |   |
| GSA-rs2609500  | 181270232 | A |   |
| GSA-rs2609483  | 181291866 | A |   |
| GSA-rs7548242  | 181296409 | A |   |
| rs9803794      | 181309400 | G |   |
| rs3845428      | 181311555 | T |   |
| rs2804699      | 181322837 | C |   |
| rs2609497      | 181343029 | C |   |
| rs605340       | 181358028 | A |   |
| GSA-rs667586   | 181372624 | A |   |
| rs16857253     | 181378661 | T |   |
| rs67837121     | 181396050 | C |   |
| rs662921       | 181416024 | G |   |
| rs6689905      | 181428264 | G |   |
| GSA-rs7521268  | 181458840 | A |   |
| rs681271       | 181483786 | G |   |
| rs6424815      | 181507754 | T |   |
| rs10910955     | 181519521 | G |   |
| rs1953690      | 181534435 | A |   |
| rs17443123     | 181548341 | G |   |
| rs2332357      | 181554157 | C |   |
| rs199960       | 181579231 | A |   |
| rs10910979     | 181653111 | T |   |
| rs72735234     | 181697195 | G |   |
| rs3767000      | 181712290 | G |   |
| GSA-rs3767003  | 181716658 | G |   |
| rs697259       | 181736189 | A |   |
| seq_rs169235   | 181740924 | G |   |
| rs704326       | 181759657 | G |   |
| GSA-rs610100   | 181778329 | C |   |
| GSA-rs3856109  | 182069992 | T |   |
| rs1689804      | 182121598 | G |   |
| GSA-rs10911032 | 182185360 | T |   |
| rs10494545     | 182200659 | T |   |
| rs2251093      | 182226964 | G |   |
| rs4600010      | 182262763 | A |   |
| rs12142225     | 182298784 | G |   |
| GSA-rs10797768 | 182312476 | A |   |
| rs2252483      | 182333131 | G |   |
| rs12136955     | 182358944 | A |   |
| rs1409051      | 182377181 | A |   |
| rs267855       | 182387507 | G |   |
| rs6692352      | 182397765 | T |   |
| rs6667166      | 182404101 | T |   |
| rs6677117      | 182410409 | G |   |
| rs7535533      | 182496829 | G |   |



|                |           |   |
|----------------|-----------|---|
| rs579006       | 182549336 | G |
| rs627928       | 182551337 | C |
| GSA-rs3738579  | 182556036 | G |
| rs12041623     | 182561633 | C |
| rs10797788     | 182623509 | G |
| rs2482806      | 182684087 | A |
| rs2275171      | 182784022 | C |
| rs9425569      | 182942202 | G |
| seq_rs10752881 | 182973491 | A |
| rs2483675      | 183118282 | T |
| rs10911269     | 183134719 | A |
| rs519544       | 183157131 | G |
| rs672059       | 183162539 | G |
| rs616545       | 183298150 | G |
| GSA-rs10797875 | 183298502 | T |
| GSA-rs664422   | 183325722 | C |
| rs2022013      | 183353853 | C |
| rs2274064      | 183542387 | C |
| rs10911367     | 183561517 | T |
| GSA-rs34840421 | 183579729 | T |
| GSA-rs4507976  | 183666920 | G |
| rs1926830      | 183713441 | A |
| GSA-rs766721   | 183761310 | G |
| rs4652825      | 183793323 | G |
| rs6424913      | 183798877 | A |
| rs10494569     | 183802970 | T |
| rs3010055      | 183817289 | T |
| rs4651156      | 183837032 | A |
| rs10911457     | 183843104 | T |
| GSA-rs11585126 | 183850901 | A |
| seq_rs10797919 | 183852914 | G |
| GSA-rs10797921 | 183886016 | A |
| rs10494572     | 183983580 | A |
| rs756199       | 184002874 | G |
| rs3814333      | 184007119 | T |
| rs1327124      | 184014199 | G |
| rs1926872      | 184018475 | C |
| rs2274432      | 184020945 | A |
| rs1046934      | 184023529 | C |
| rs10911505     | 184049978 | C |
| rs971572       | 184068508 | A |
| rs10911518     | 184111365 | A |
| rs732812       | 184113245 | C |
| rs6424925      | 184128264 | A |
| rs4650656      | 184148645 | T |
| rs7527771      | 184149990 | T |
| rs10911524     | 184169492 | G |
| rs6696916      | 184192465 | A |
| rs10911551     | 184241399 | C |
| rs932993       | 184283674 | T |
| rs9787399      | 184294796 | T |
| rs2779286      | 184297478 | G |
| rs75488863     | 184498780 | C |
| rs749214       | 184536171 | T |
| rs7540093      | 184603098 | A |
| rs6671374      | 184621930 | A |
| rs3895196      | 184728874 | T |

|                 |           |   |
|-----------------|-----------|---|
| GSA-rs682331    | 184761365 | A |
| rs234644        | 184833344 | G |
| GSA-rs74705099  | 184840553 | A |
| rs234660        | 184852414 | G |
| rs234633        | 184899649 | A |
| rs10911659      | 184905261 | C |
| rs7512071       | 184921581 | C |
| rs170885        | 184941749 | G |
| rs234117        | 184951676 | T |
| rs6424976       | 185317357 | T |
| rs2281415       | 185392845 | T |
| rs10798014      | 185394834 | G |
| GSA-rs6685999   | 185451824 | G |
| rs12128031      | 185453884 | A |
| rs232298        | 185455790 | C |
| rs10911748      | 185497338 | T |
| rs1407277       | 185500084 | G |
| rs4651268       | 185512838 | G |
| rs1321996       | 185515461 | A |
| GSA-rs74455225  | 185619568 | T |
| GSA-rs115539402 | 185882740 | T |
| GSA-rs113533719 | 185985526 | A |
| rs4141459       | 185995616 | C |
| rs12129650      | 186026474 | T |
| rs10798035      | 186050417 | G |
| rs4651295       | 186054055 | G |
| rs7545010       | 186126099 | G |
| GSA-rs586727    | 186155692 | T |
| GSA-rs6676055   | 186190163 | T |
| GSA-rs1795022   | 186247924 | A |
| rs1293970       | 186258229 | G |
| GSA-rs1293989   | 186267100 | A |
| rs2273779       | 186273994 | C |
| GSA-rs3131557   | 186441585 | G |
| rs5275          | 186643058 | G |
| rs4651331       | 186817041 | G |
| rs12143166      | 186859489 | G |
| rs10798069      | 186875459 | G |
| rs12726519      | 186898065 | T |
| rs6697145       | 186910591 | T |
| rs10489409      | 186920114 | C |
| GSA-rs28395831  | 186946869 | G |
| rs10798078      | 186967702 | G |
| rs12139055      | 186968711 | G |
| rs12566908      | 186969167 | C |
| GSA-rs55778118  | 186992276 | C |
| GSA-rs12239390  | 187000047 | G |
| rs1160832       | 187013915 | A |
| rs72716034      | 187027181 | G |
| rs1474864       | 187033589 | T |
| GSA-rs72716052  | 187050762 | G |
| GSA-rs10911998  | 187057847 | C |
| rs1924724       | 187154470 | T |
| GSA-rs4144116   | 187267411 | A |
| rs2802474       | 187328545 | G |
| GSA-rs10912059  | 187354887 | A |
| rs10798107      | 187362785 | T |

rs1339082

187524280

A
